# Supplementary material for: The Analysis of a Genome-Wide Association Study (GWAS) of Overweight and Obesity in Psoriasis
Source: MDPI journal article supplement (doi:10.3390/ijms23137396), 2022-07-02

With this supplementary file we present boxplots for BMI across study groups (0=control, 2=type I psoriasis, 3=type II psoriasis) and SNP genotypes (0=homozygote major, 1=heterozygote, 2=homozygote minor). The lines represent median, the hinges stand for quartiles and whiskers are defined by the limits of the confidence interval for the quartiles.

1. Coding SNPs:

1.1. **rs1558902**, *FTO*

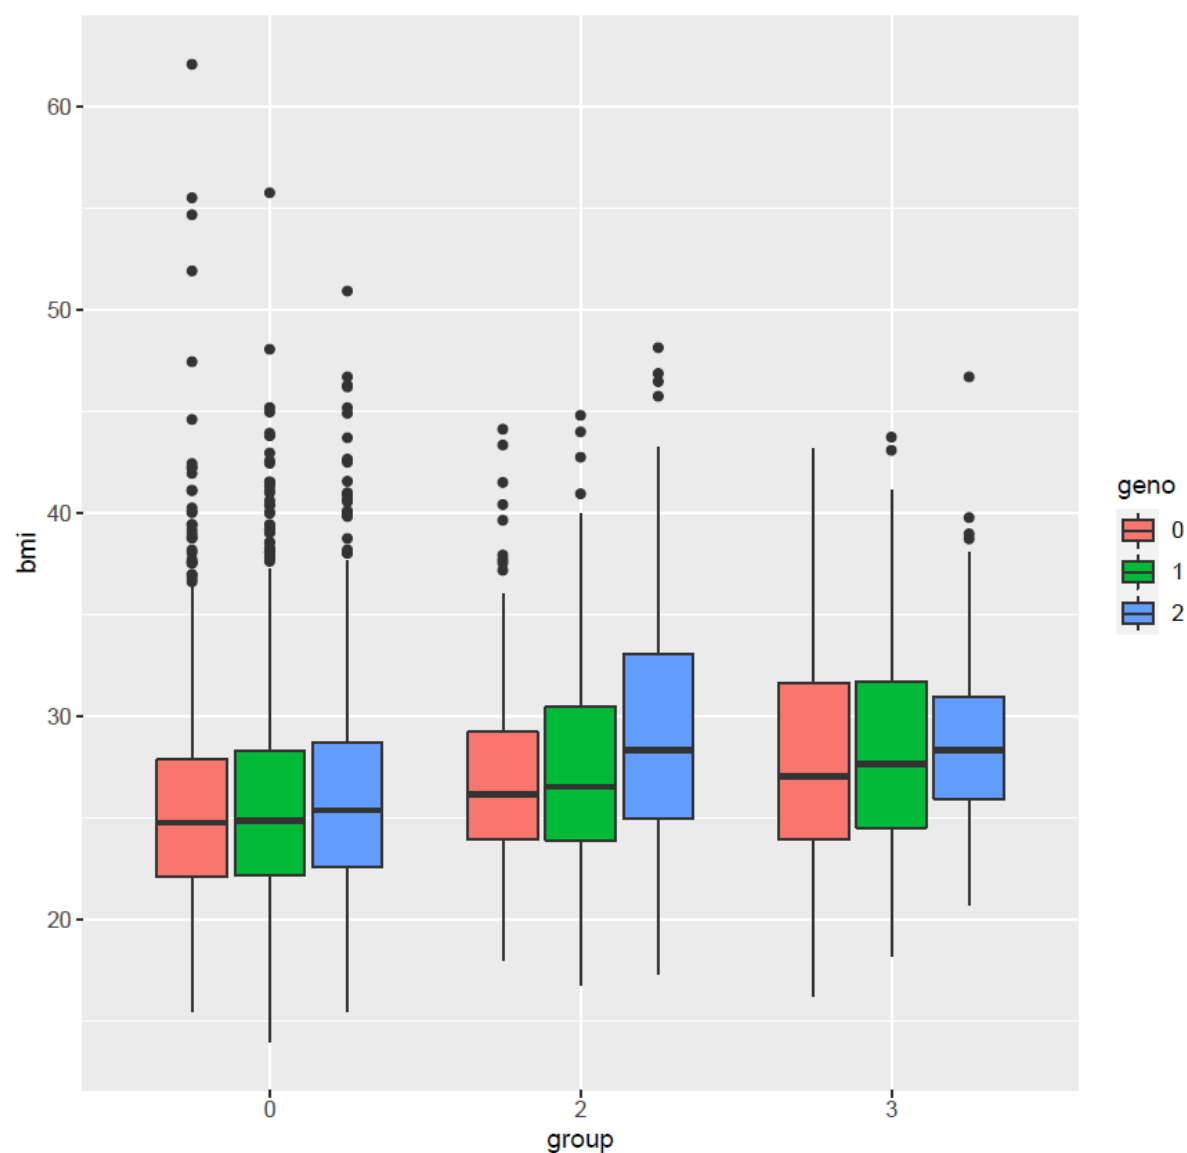

### 1.2. rs1556519, *ITLN2*

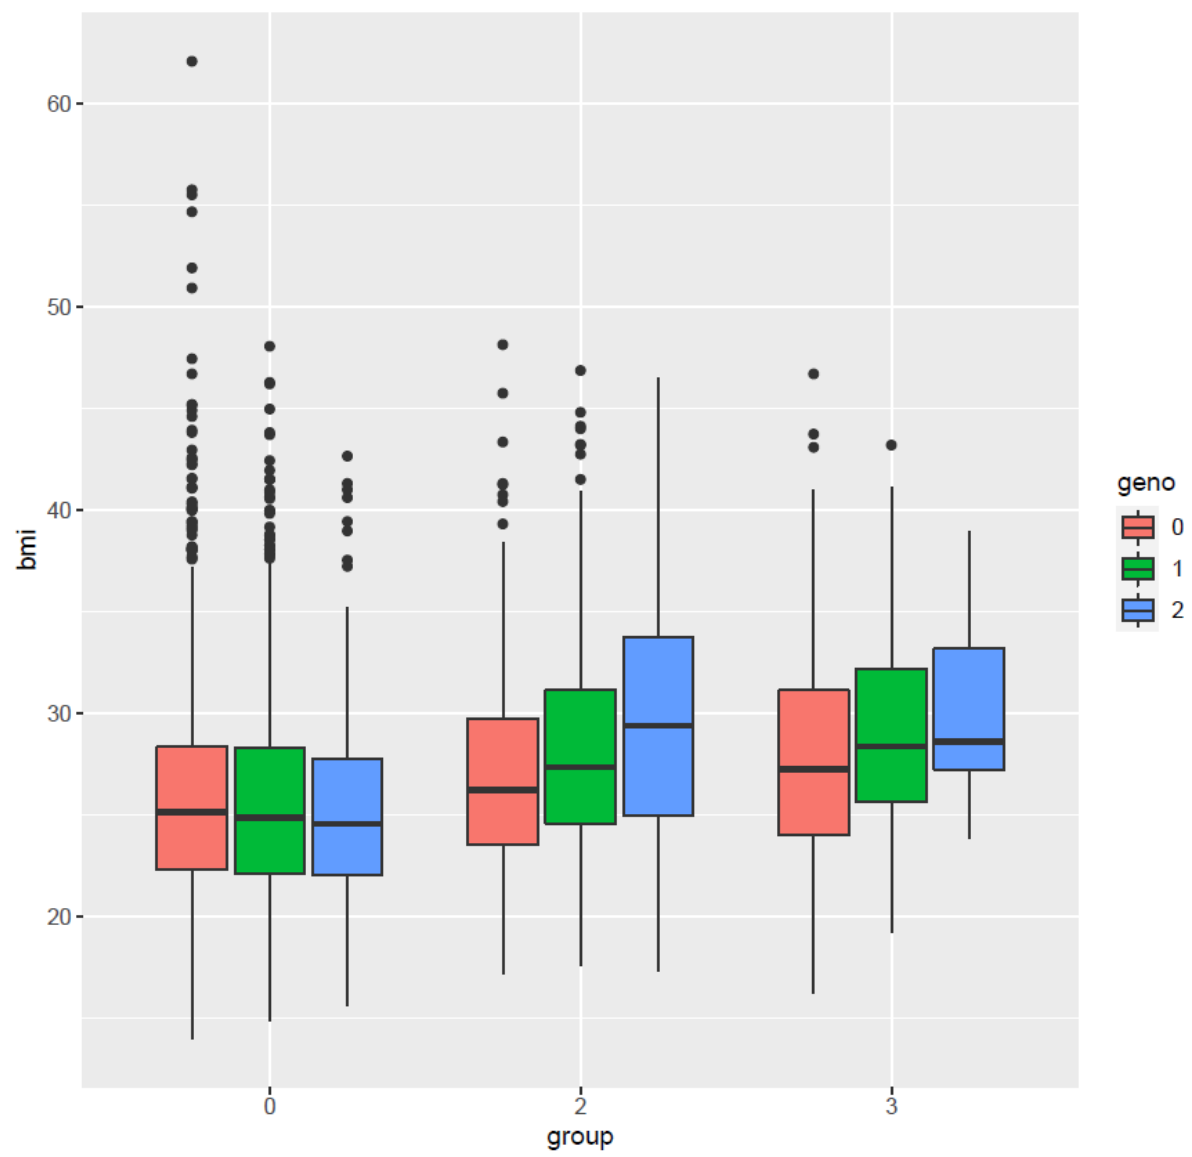

1.3. rs12972098, AC003006.7

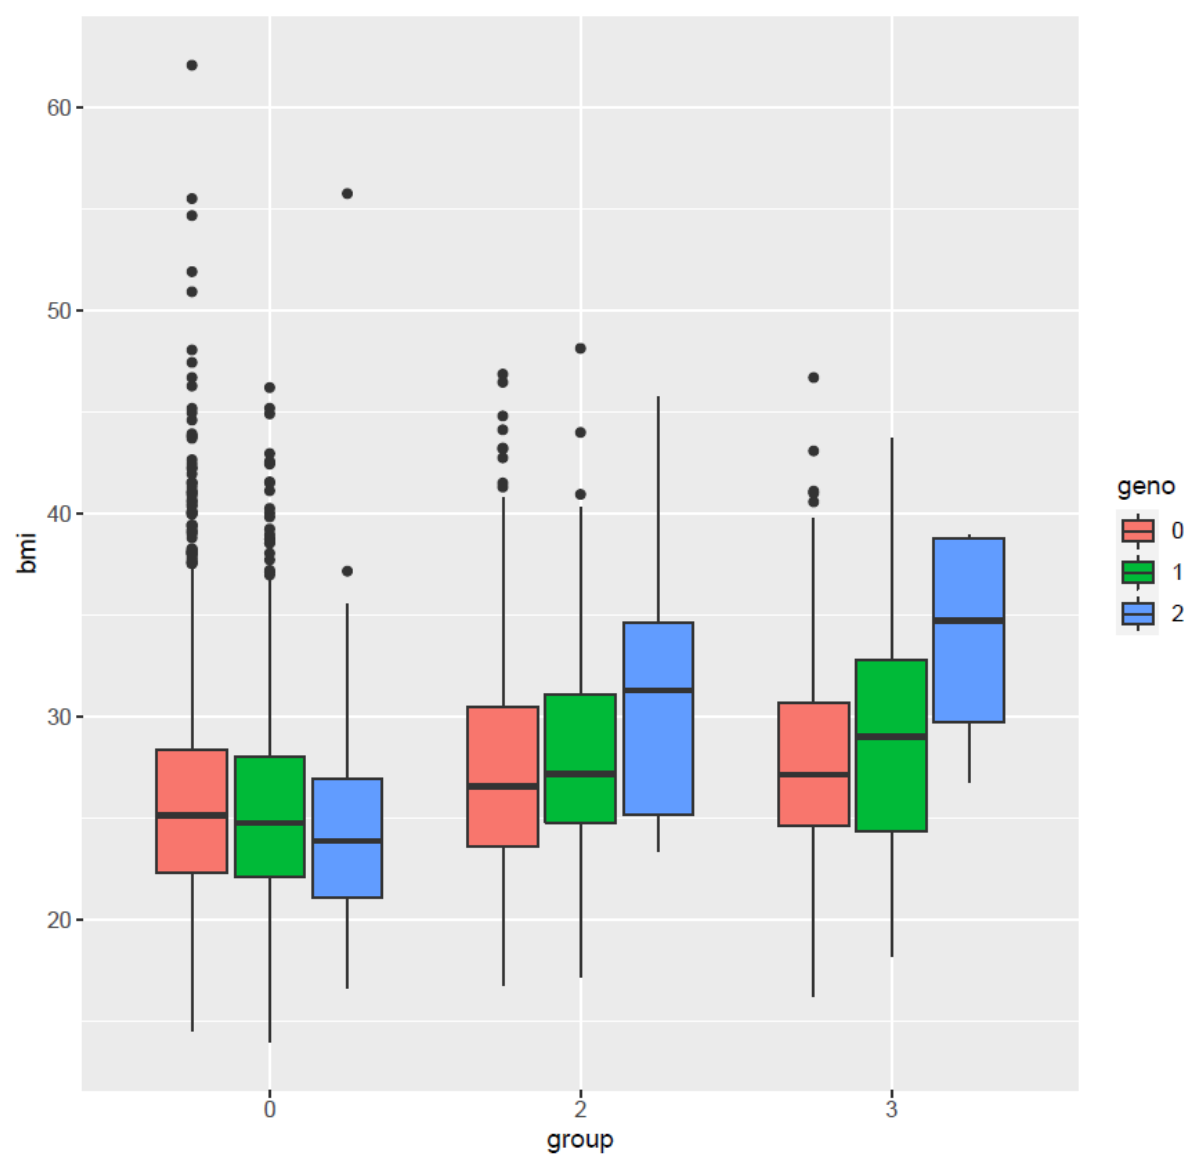

1.4. rs12676670, *PAG1*

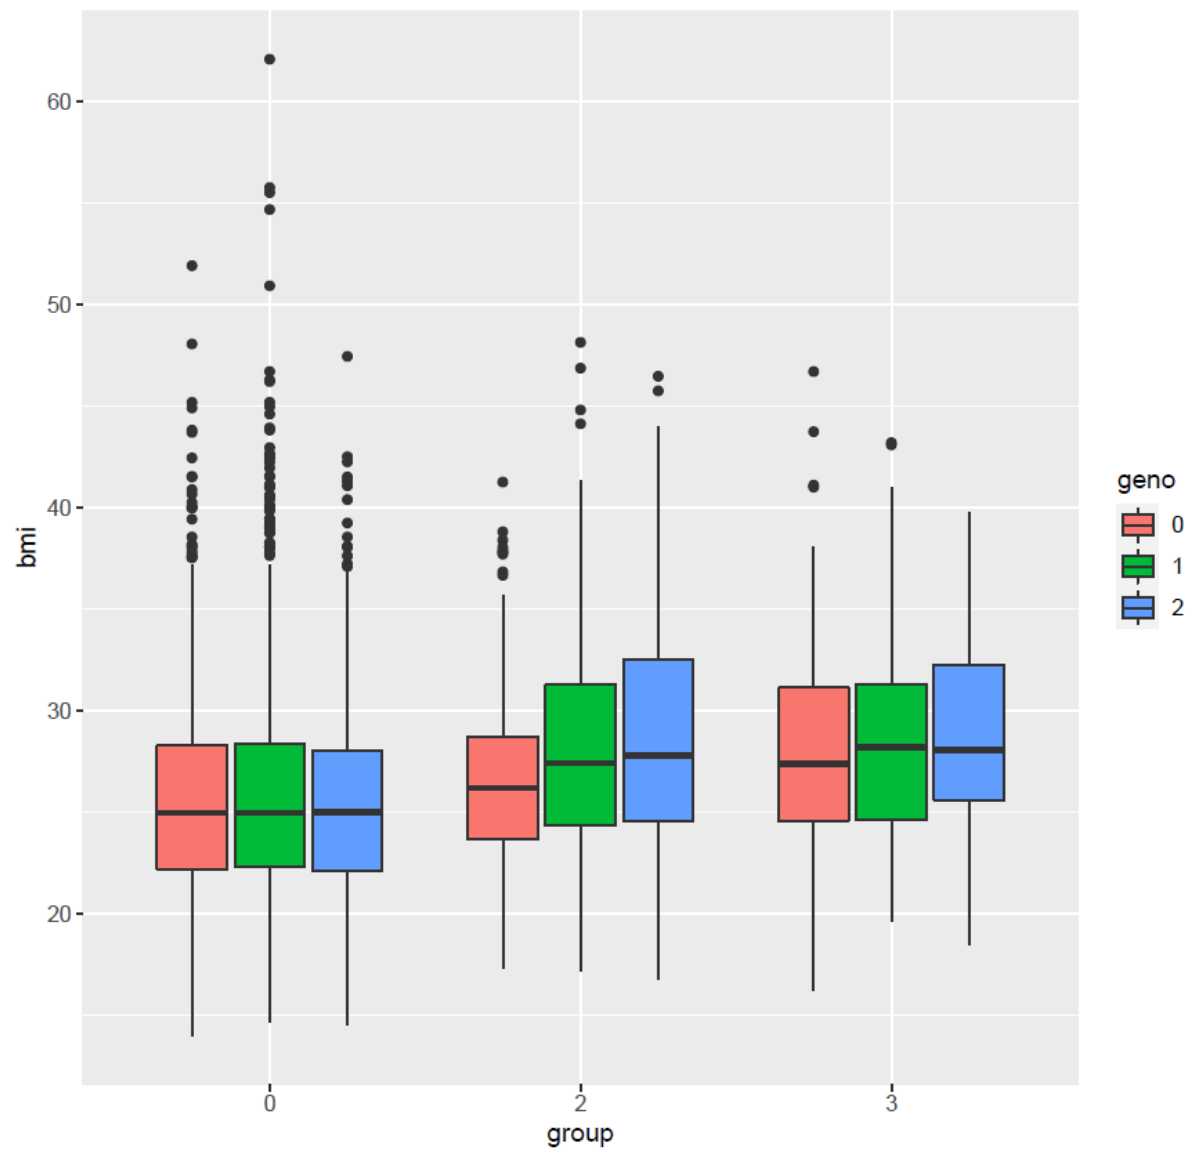

1.5. rs696574, *CALCR1*

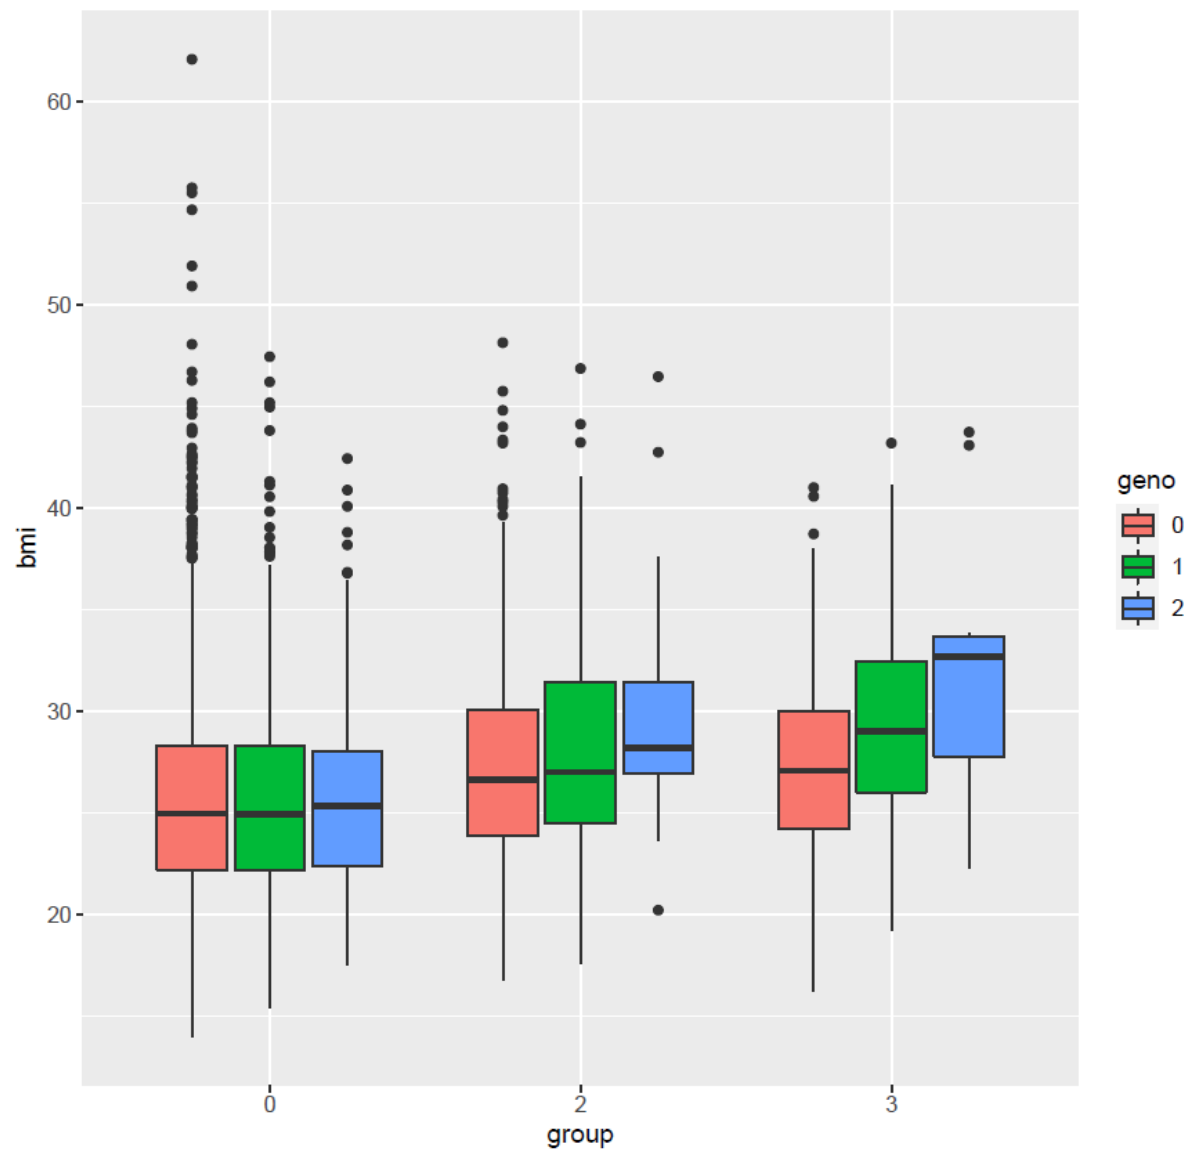

## 2. Non-coding SNPs:

### 2.1. rs10968110, chr 9, 27792965 bp

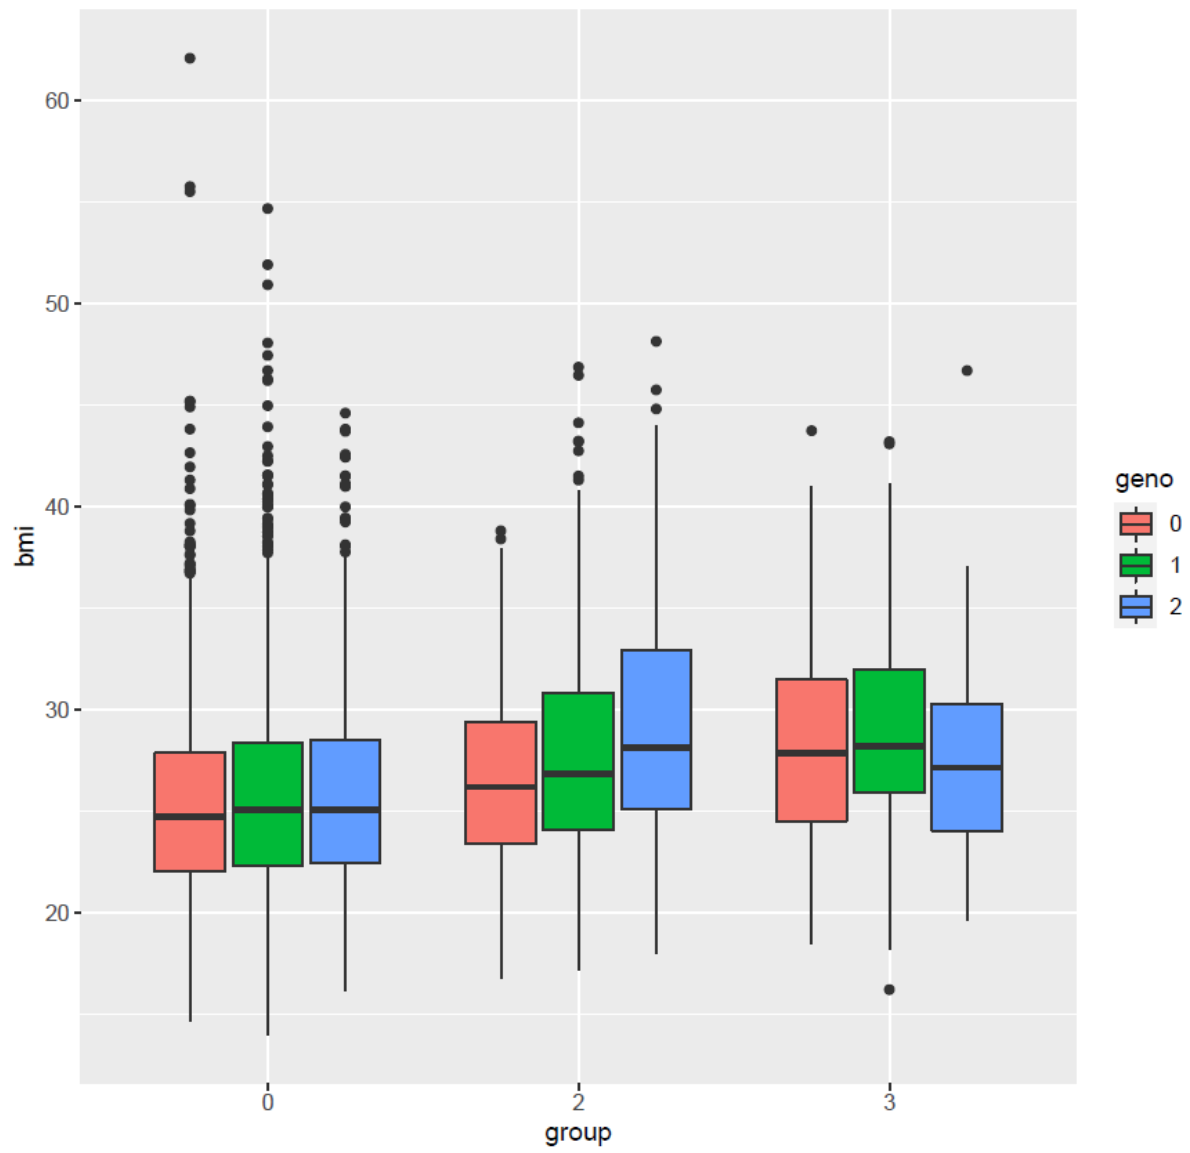

2.2. rs4609724, chr 13, 55666639 bp

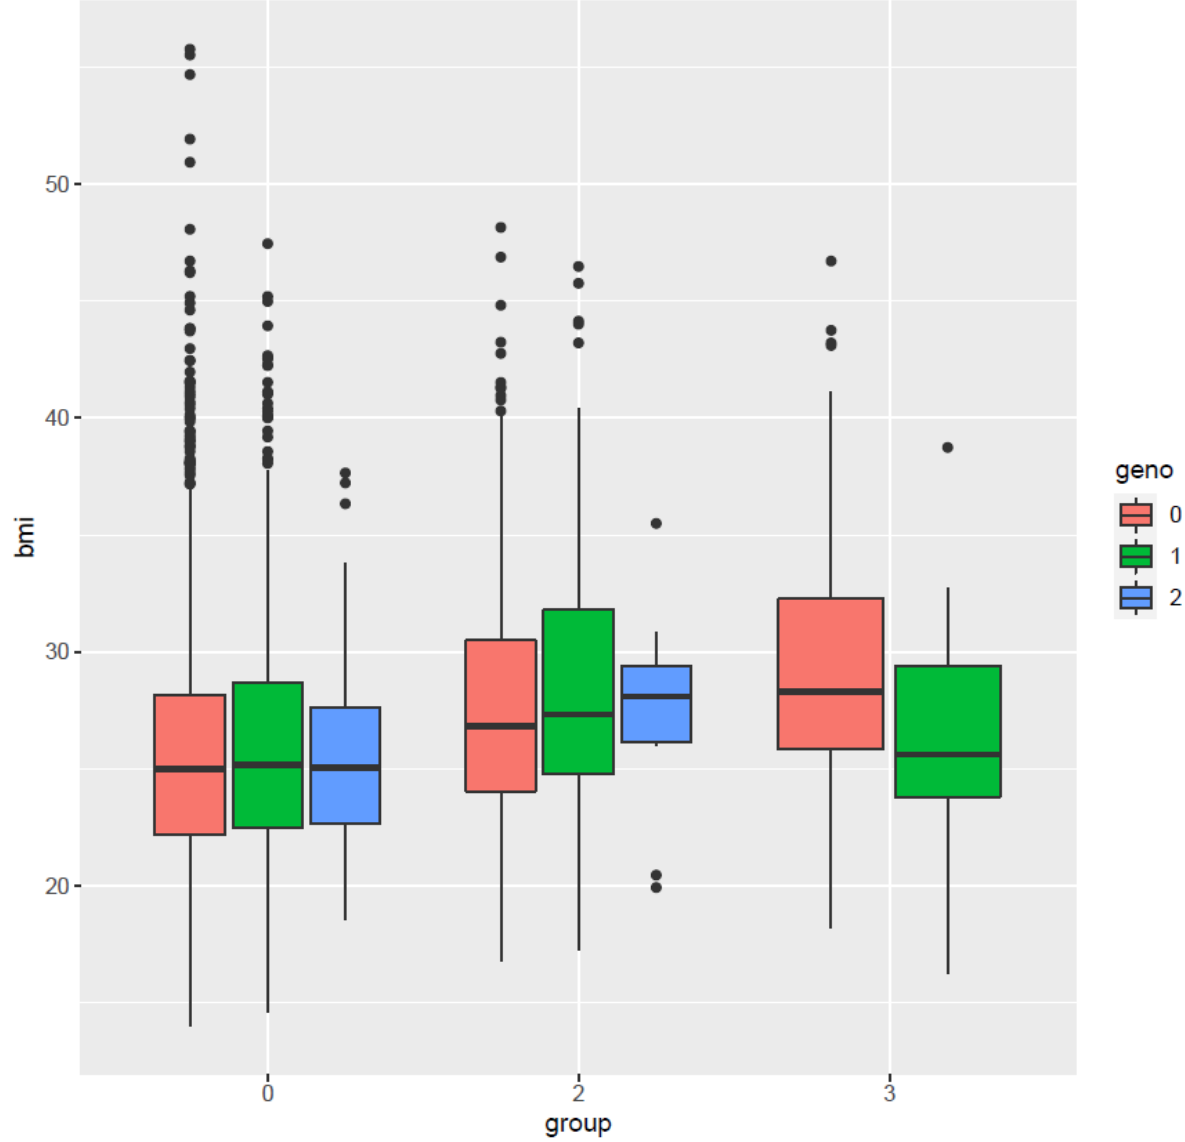

2.3. **rs4551082**, chr 5, 29620270 bp

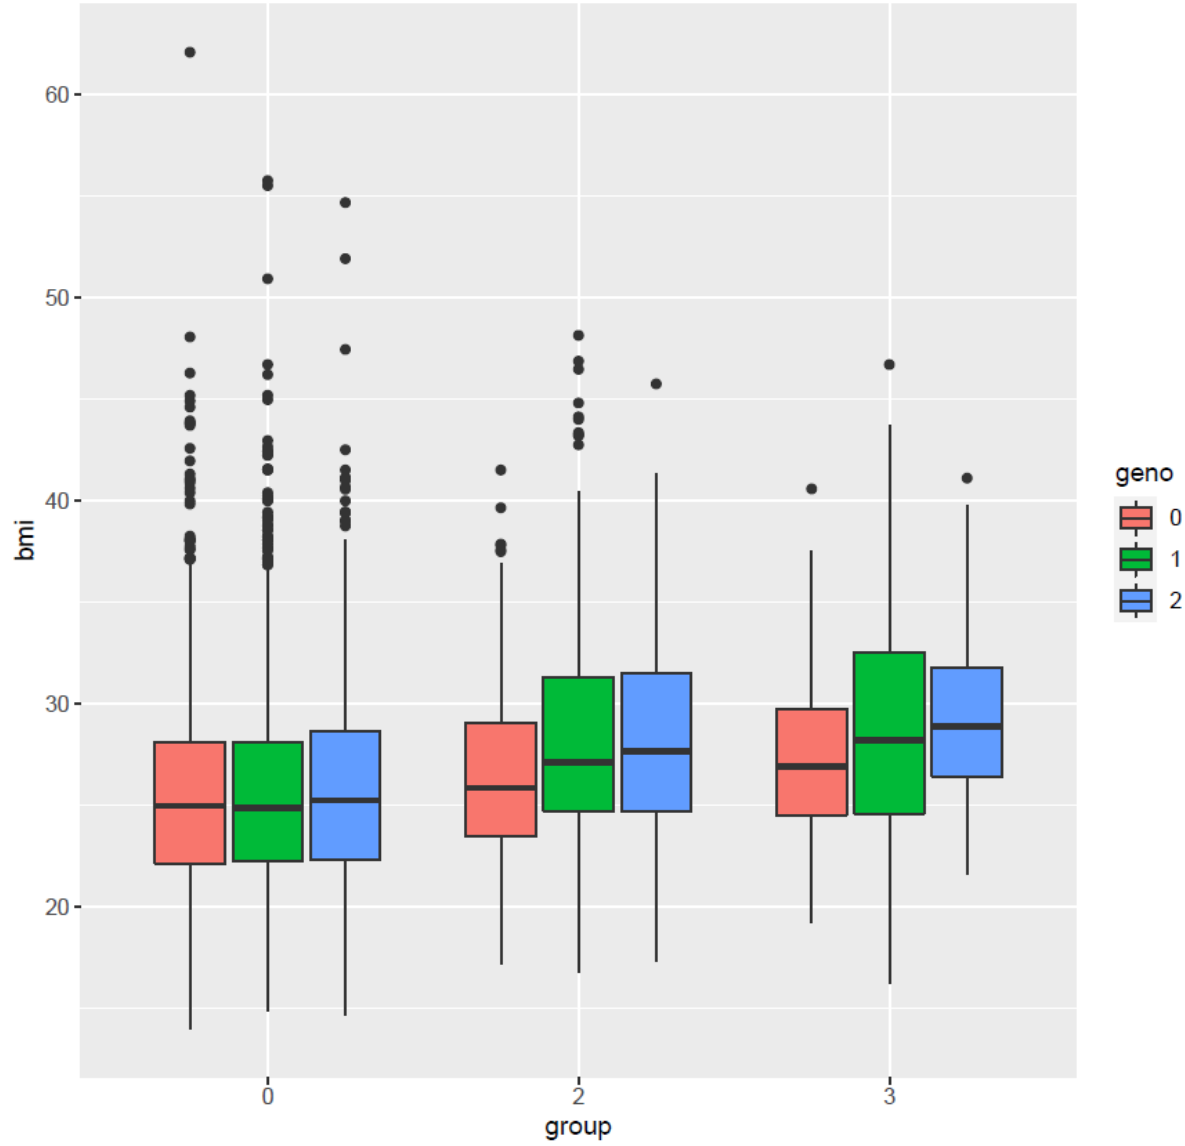



2.4. rs9320269, chr 6, 109032557 bp

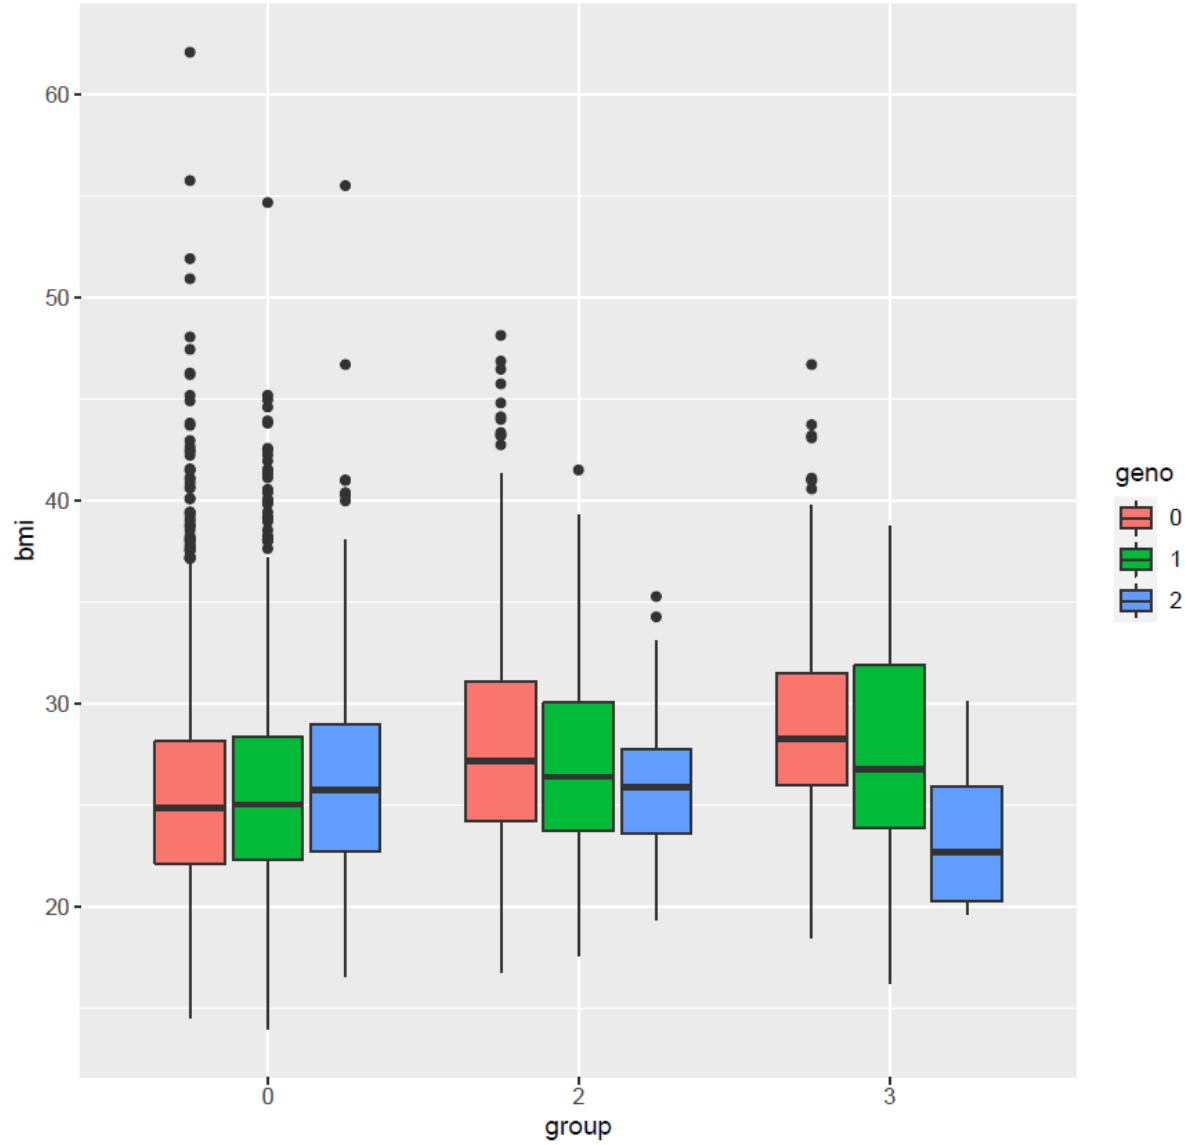

2.5. **rs2338833**, chr 5, 109032557 bp

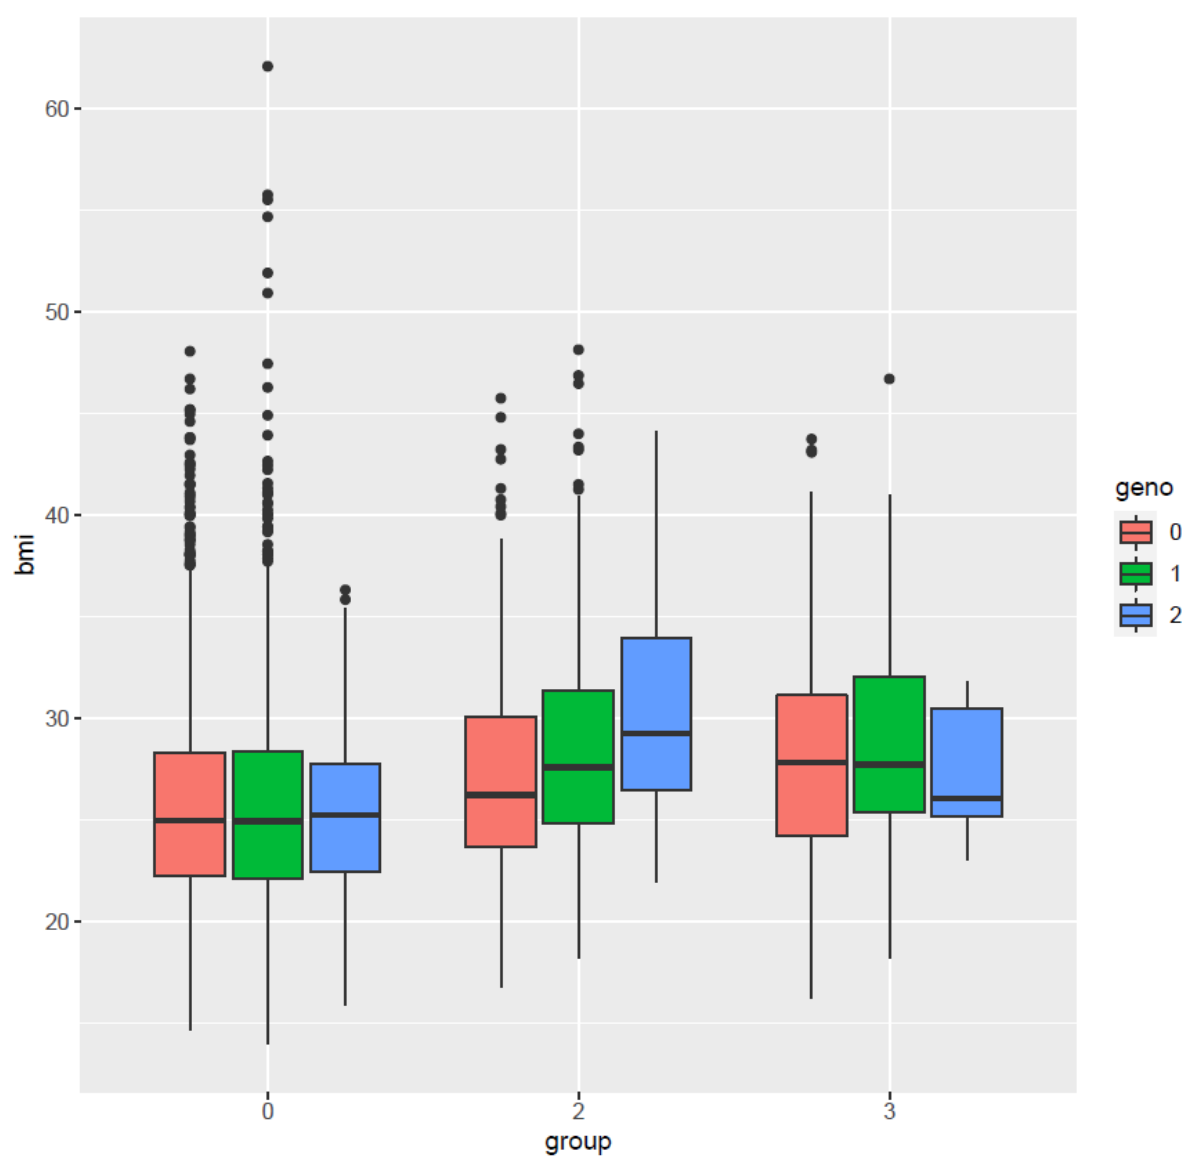

2.6. **rs1321529**, chr 6, 145601560 bp

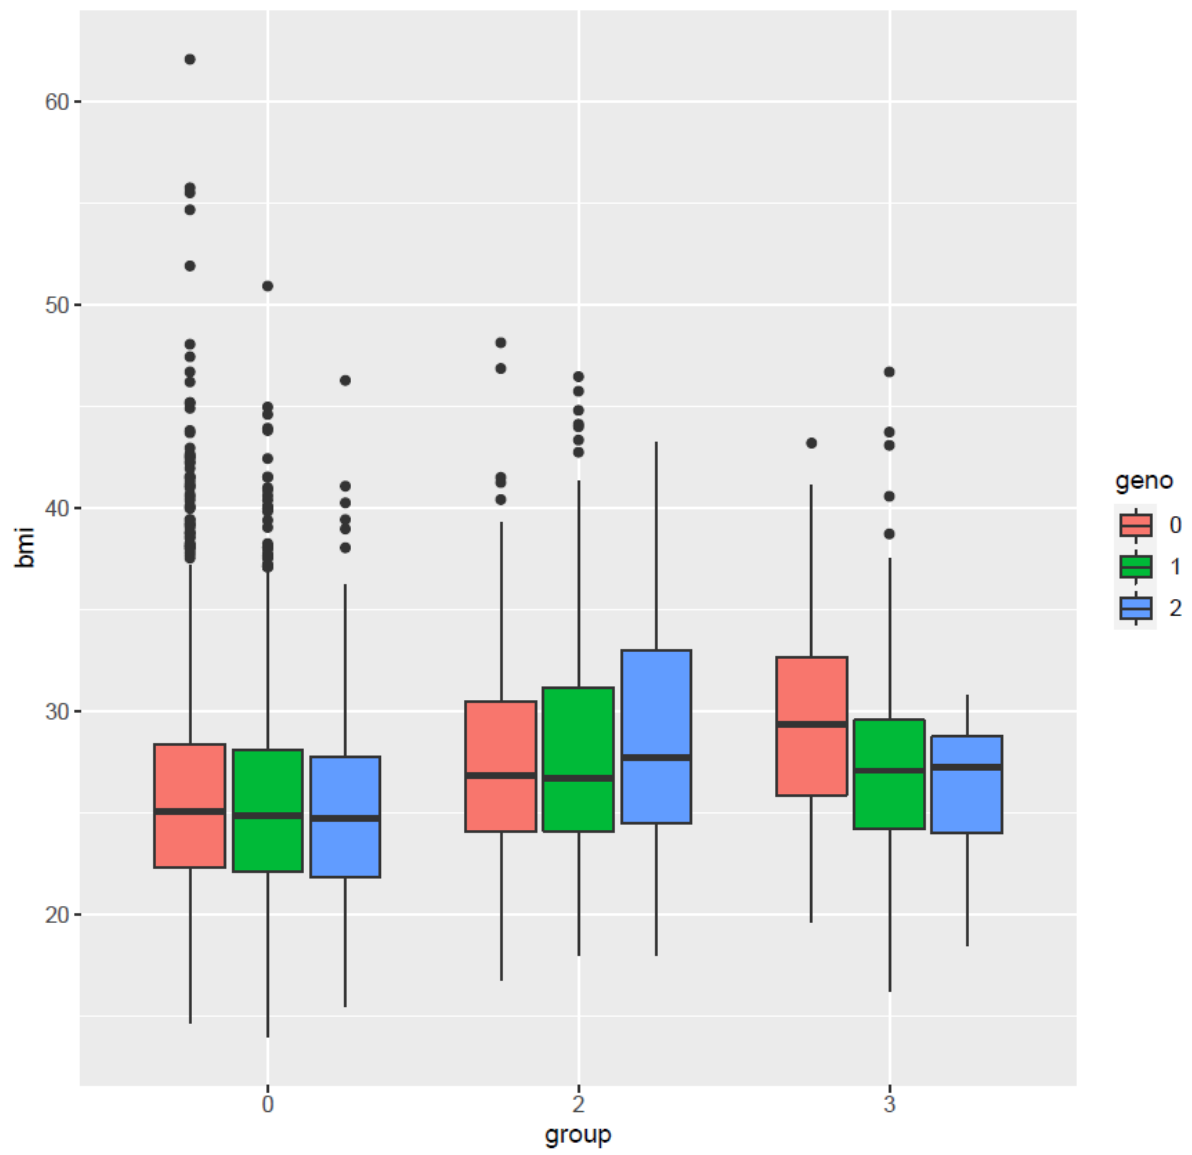

Supplement: s1 [file s1]
