# Supplementary material for: The Analysis of a Genome-Wide Association Study (GWAS) of Overweight and Obesity in Psoriasis
Source: Int J Mol Sci. 2022 Jul 2;23(13):7396. doi: 10.3390/ijms23137396 (PMC9266424; doi:10.3390/ijms23137396)
Supplement: Supplementary file 1 [file ijms-23-07396-s001.zip]

Archive with 5 entries (5 files):
- Supplementary Figure S1.pdf
- Supplementary Figure S2.pdf
- Supplementary Table S1 GWAS results for the interaction effect between BMI, SNP and types of psoriasis-1.xlsx
- Supplementary Table S2 Distribution of genotype frequencies of the detected 11 significant SNPs.xlsx
- Supplementary Table S3 The study group data analysis..xlsx
