# Supplementary material for: The Analysis of a Genome-Wide Association Study (GWAS) of Overweight and Obesity in Psoriasis
Source: Int J Mol Sci. 2022 Jul 2;23(13):7396. doi: 10.3390/ijms23137396 (PMC9266424; doi:10.3390/ijms23137396)
Supplement: Supplementary file 1 [file ijms-23-07396-s001.zip › Supplementary Table S1 GWAS results for the interaction effect between BMI, SNP and types of psoriasis-1.xlsx]

## Sheet: Arkusz1
Table S1. GWAS results for the interaction effect between BMI, SNP, and types of psoriasis.
variant.id	chr	pos	n.obs	freq	MAC	Est.G	Est.G:p42	Est.G:p43	SE.G	SE.G:p42	SE.G:p43	GxE.Stat	Joint.Stat	GxE.pval	Joint.pval
rs1558902	16	53803574	6832	0.466115	6369	0.318627	0.873457	0.298277	0.0920921	0.255784	0.464855	3.43996	6.08759	0.00269419	4.47158e-08
rs1421085	16	53800954	6857	0.465656	6386	0.316313	0.808863	0.334146	0.0919571	0.254258	0.463249	3.22183	5.8989	0.00557143	1.34468e-07
rs10968110	9	27792965	6850	0.439051	6015	0.225899	1.07045	-0.645818	0.0899627	0.261109	0.473308	4.4114	5.89832	5.9458e-05	1.34917e-07
rs10968114	9	27800007	6837	0.478353	6541	0.204158	1.00079	-1.07986	0.0889473	0.260137	0.473484	4.60396	5.73517	2.49601e-05	3.39388e-07
rs9940128	16	53800754	6856	0.48133	6600	0.26186	0.897007	0.526891	0.0916164	0.257017	0.473502	3.60218	5.73185	0.00152182	3.4572e-07
rs9930333	16	53799977	6856	0.480236	6585	0.260955	0.891464	0.435864	0.0915782	0.256216	0.478223	3.5476	5.66222	0.00184967	5.08156e-07
rs9939973	16	53800568	6858	0.480388	6589	0.259609	0.892557	0.38244	0.091565	0.25622	0.475726	3.53207	5.6284	0.00195426	6.11578e-07
rs1121980	16	53809247	6857	0.480604	6591	0.259084	0.856645	0.437155	0.0916268	0.255952	0.47828	3.41996	5.53145	0.00288545	1.03347e-06
rs1556519	1	160917902	6797	0.26828	3647	-0.180391	1.47727	1.21123	0.102504	0.291365	0.521066	5.44074	5.45178	3.73324e-07	1.579e-06
rs12972098	19	58249304	6853	0.171458	2350	-0.408133	1.41858	2.21063	0.117532	0.349047	0.657486	5.11951	5.41647	2.03563e-06	1.90136e-06
rs4551082	5	29620270	6836	0.39921	5458	0.134778	1.00779	0.972212	0.0892548	0.267004	0.495648	4.15732	5.27888	0.000176593	3.87391e-06
rs12676670	8	81981261	6857	0.413957	5677	-0.0353761	1.26464	0.120878	0.0907126	0.25232	0.489138	5.01276	5.23131	3.49608e-06	4.93216e-06
rs4609724	13	55666639	6739	0.113963	1536	0.308242	0.67781	-3.53782	0.142735	0.412275	0.821796	4.7101	5.20741	1.52257e-05	5.56385e-06
rs9320269	6	109032557	6858	0.190799	2617	0.320152	-1.09263	-2.48904	0.112701	0.342357	0.608141	5.04077	5.19561	3.03689e-06	5.90336e-06
rs10852521	16	53804965	6855	0.438366	6010	-0.231264	-0.836725	-0.512479	0.0911649	0.262091	0.50074	3.29884	5.16188	0.00433436	6.9874e-06
rs1330199	9	27760946	6835	0.4703	6429	0.180162	0.919458	-0.823358	0.089322	0.257246	0.474123	4.08128	5.15257	0.000241552	7.31891e-06
rs2338833	5	169512063	6856	0.19472	2670	0.0088005	1.55541	0.378795	0.111521	0.327173	0.633133	4.76365	5.11274	1.18144e-05	8.91449e-06
rs1321529	6	145601560	6854	0.284141	3895	-0.340213	0.95038	-1.35925	0.100496	0.290201	0.562107	4.19603	5.0979	0.00015023	9.58994e-06
rs696574	2	188228516	6848	0.169173	2317	0.0157895	1.03104	2.28344	0.119786	0.343456	0.595987	4.70892	5.09029	1.53103e-05	9.95544e-06
rs7834107	8	81997301	6855	0.498541	6835	0.0600008	-1.26612	-0.0928245	0.0896125	0.255834	0.489894	4.95078	5.07205	4.76077e-06	1.08858e-05
rs6570592	6	144258244	6856	0.493582	6768	0.0370588	-0.228922	-2.30872	0.0884531	0.257232	0.463453	5.01265	5.06862	3.498e-06	1.10697e-05
rs6012418	20	47036502	6850	0.112117	1536	-0.616326	0.340786	2.45081	0.140048	0.412692	0.783268	3.19245	5.05452	0.00612202	1.18579e-05
rs7150327	14	22606250	6857	0.201838	2768	-0.179169	1.4059	-1.36608	0.110659	0.323701	0.620832	4.99478	5.02777	3.82521e-06	1.35026e-05
rs13412552	2	77292449	6856	0.246135	3375	-0.328185	-0.549989	1.65768	0.104024	0.309374	0.540523	3.64826	5.01626	0.00128771	1.42762e-05
rs1407795	6	5822192	6826	0.291386	3978	0.0169872	1.22144	-1.50804	0.0978309	0.303325	0.595226	4.87713	5.00564	6.83686e-06	1.50268e-05
rs10419898	19	58329063	6846	0.163818	2243	-0.309992	1.48546	1.84482	0.121038	0.351959	0.651702	4.93509	4.99712	5.14457e-06	1.56557e-05
rs4237366	10	25099184	6858	0.323928	4443	-0.0567355	-1.20273	-0.0793552	0.0943879	0.27058	0.51081	4.44672	4.99654	5.08477e-05	1.57e-05
rs663573	20	48386481	6854	0.34396	4715	-0.277232	-0.759685	-0.154855	0.0955641	0.277001	0.471256	2.74581	4.97881	0.0230582	1.70948e-05
rs2717445	12	71035873	6856	0.262106	3594	-0.161864	-0.383711	-2.01185	0.101363	0.2985	0.514913	4.04021	4.97158	0.000285396	1.76972e-05
rs11041788	11	8208348	6847	0.255221	3495	0.0461958	0.169196	2.45799	0.102338	0.30291	0.522514	4.71048	4.95508	1.51987e-05	1.9148e-05
rs1587158	1	227658753	6166	0.11977	1477	0.346407	1.37237	0.151136	0.144696	0.423456	0.769911	3.2409	4.95367	0.0052385	1.92774e-05
rs1281322	1	182101577	6856	0.481914	6608	-0.256463	-0.113544	2.07921	0.0897986	0.252651	0.496684	4.24572	4.95196	0.000121805	1.94351e-05
rs2950220	5	60994164	6856	0.25248	3462	-0.073376	-0.1176	2.81705	0.102596	0.312806	0.574052	4.95036	4.95088	4.77058e-06	1.95353e-05
rs10864007	1	213020221	6494	0.30251	3929	0.0373389	1.27689	-0.266521	0.0995433	0.284491	0.507749	4.56332	4.94365	3.00715e-05	2.02193e-05
rs8050136	16	53816275	6849	0.446927	6122	0.259022	0.693181	0.364176	0.092172	0.256442	0.463578	2.77047	4.94268	0.021542	2.03126e-05
rs4854097	2	241140571	6843	0.279848	3830	-0.318804	-0.416194	-1.03703	0.097994	0.289156	0.534832	2.3466	4.93032	0.0637199	2.15413e-05
rs17817449	16	53813367	6855	0.447046	6129	0.255936	0.69607	0.366944	0.0920742	0.25641	0.463572	2.78301	4.92534	0.020805	2.20559e-05
rs9403680	6	145604408	6854	0.340239	4664	-0.296942	0.783435	-1.44279	0.0956735	0.273311	0.533444	4.0678	4.92398	0.000255195	2.21984e-05
rs9939609	16	53820527	6855	0.446681	6124	0.255519	0.696432	0.367375	0.092062	0.25641	0.463569	2.78458	4.923	0.0207139	2.2301e-05
rs9936385	16	53819169	6857	0.446697	6126	0.254044	0.697816	0.368808	0.0920349	0.2564	0.463563	2.79059	4.91442	0.02037	2.32245e-05
rs1456508	4	45720024	6757	0.199571	2697	0.22803	1.17935	-0.603394	0.110981	0.336333	0.627097	3.69937	4.91347	0.00106725	2.3329e-05
rs8025255	15	94617964	6848	0.166472	2280	-0.0750549	-1.24013	-1.66355	0.118929	0.339704	0.679258	4.27647	4.91297	0.000106849	2.33846e-05
rs6581950	12	71043296	6785	0.261385	3547	-0.154852	-0.398186	-2.02199	0.101408	0.301277	0.521579	4.02255	4.90911	0.000306456	2.38153e-05
rs761422	1	17301780	6625	0.431094	5712	0.0961826	-1.293	-0.259235	0.0930301	0.267002	0.480946	4.84724	4.90025	7.90601e-06	2.4831e-05
rs782097	12	58814968	6856	0.210764	2890	-0.259694	1.52272	-0.578806	0.108637	0.332438	0.598288	4.7462	4.89316	1.28368e-05	2.56741e-05
rs7193144	16	53810686	6850	0.44708	6125	0.251725	0.698801	0.371222	0.092054	0.257073	0.466869	2.78773	4.88543	0.0205332	2.66239e-05
rs2396099	7	109053967	6834	0.114282	1562	-0.0212939	-1.53299	2.07884	0.141141	0.407037	0.780248	4.75901	4.87612	1.20783e-05	2.78123e-05
rs11249497	4	71237421	6848	0.114705	1571	0.209095	-0.259299	3.3679	0.138305	0.398227	0.784584	4.38862	4.86593	6.57262e-05	2.91709e-05
rs9514558	13	107282426	6855	0.372429	5106	-0.0273733	-0.742126	-1.73405	0.091224	0.264351	0.479639	4.44085	4.86165	5.21926e-05	2.97606e-05
rs737967	22	17702778	6684	0.396694	5303	0.105106	-1.25033	0.232492	0.0918523	0.261356	0.522953	4.84061	4.86039	8.16428e-06	2.99357e-05
rs3760360	17	41988992	6856	0.433051	5938	-0.336785	-0.330941	1.06397	0.0900157	0.263957	0.480743	2.62037	4.84517	0.0322845	3.21369e-05
rs7953367	12	20786218	6838	0.204592	2798	0.229189	-0.375337	-2.8764	0.110905	0.317815	0.619001	4.73117	4.84069	1.37843e-05	3.28147e-05
rs6095646	20	48378740	6855	0.33946	4654	-0.276521	-0.733257	-0.0639837	0.0959942	0.278713	0.469439	2.63139	4.83318	0.0313637	3.39802e-05
rs2904783	6	31459972	6854	0.323898	4440	0.340135	-0.116911	1.45384	0.0996576	0.303131	0.529685	2.79623	4.83124	0.0200513	3.42864e-05
rs11734278	4	181167766	6830	0.289385	3953	0.00526062	1.23609	-0.782514	0.0973445	0.286862	0.531318	4.64842	4.82961	2.03202e-05	3.45477e-05
rs4391897	12	24130158	6849	0.26106	3576	-0.16068	1.28415	1.46188	0.100508	0.301393	0.582752	4.82467	4.82703	8.81809e-06	3.49624e-05
rs237784	1	229471199	6854	0.473373	6489	0.119284	0.633906	1.58349	0.0890691	0.264043	0.49103	3.90765	4.81965	0.000483311	3.61787e-05
rs1986703	7	153301445	6858	0.176728	2424	0.494583	-0.314781	-1.87391	0.116164	0.35854	0.638957	3.01519	4.81898	0.010613	3.62902e-05
rs11623212	14	27350629	6837	0.164985	2256	-0.0563737	0.621167	3.00768	0.119266	0.340567	0.672734	4.73245	4.81615	1.37011e-05	3.67688e-05
rs6020041	20	48398879	6852	0.354641	4860	-0.281721	-0.608644	-0.486388	0.0945821	0.27353	0.478685	2.38699	4.81558	0.0579106	3.68665e-05
rs869953	2	241144009	6822	0.279903	3819	-0.315209	-0.386488	-1.0324	0.0982149	0.291167	0.535847	2.27546	4.81523	0.0751051	3.69263e-05
rs2279575	12	77417344	6853	0.485919	6660	-0.200415	0.100573	2.20974	0.0888682	0.252472	0.484802	4.55919	4.80432	3.06436e-05	3.88337e-05
rs1450822	5	4520856	6857	0.482937	6623	0.0224368	0.354955	2.11091	0.0890574	0.259737	0.478529	4.54104	4.79125	3.32816e-05	4.12426e-05
rs803194	20	48266791	6850	0.266861	3656	-0.178448	-1.10079	0.211297	0.101771	0.302236	0.526543	3.69814	4.7912	0.00107211	4.12529e-05
rs760306	11	61724292	6856	0.297331	4077	0.090738	-1.30282	-0.649572	0.0974652	0.282949	0.504891	4.70735	4.78375	1.5424e-05	4.26903e-05
rs17041592	2	45122342	6855	0.219256	3006	0.373091	0.498181	0.369347	0.106151	0.311007	0.57601	1.69095	4.781	0.239391	4.32311e-05
rs7524203	1	213011812	6847	0.460275	6303	0.081062	1.06485	-0.557085	0.0885797	0.263702	0.498309	4.25846	4.77395	0.000115382	4.46525e-05
rs10818894	9	126695770	6854	0.233294	3198	-0.145468	1.32879	-1.01158	0.105766	0.311174	0.553205	4.76236	4.77355	1.18875e-05	4.47342e-05
rs782097	12	58814968	6852	0.210595	2886	-0.258815	1.50053	-0.461802	0.108649	0.332807	0.601317	4.62652	4.77255	2.24921e-05	4.49379e-05
rs12201798	6	117446167	6853	0.106815	1464	-0.0998875	-1.14919	2.33117	0.143072	0.417215	0.657765	4.65976	4.76429	1.92755e-05	4.66705e-05
rs10830100	10	129284413	6850	0.473358	6485	-0.0762934	1.10252	-0.985649	0.0900813	0.264047	0.490394	4.75885	4.76276	1.20874e-05	4.69978e-05
rs226926	6	3701286	6845	0.251059	3437	-0.473722	0.666375	0.0205552	0.102395	0.300662	0.535777	2.21884	4.75616	0.0852954	4.84351e-05
rs11696907	20	48355818	6804	0.277704	3779	-0.297731	-0.733877	-0.115319	0.10179	0.296885	0.511485	2.47247	4.75604	0.0470493	4.84609e-05
rs3738814	1	17331676	6853	0.433533	5942	-0.043577	1.21273	0.0254286	0.090579	0.262835	0.483191	4.61995	4.75114	2.31854e-05	4.95573e-05
rs16893687	5	60982841	6822	0.337218	4601	-0.127776	-0.115231	2.46654	0.0949493	0.288021	0.53236	4.68125	4.74843	1.74343e-05	5.01723e-05
rs4766950	12	120278241	6858	0.446777	6128	0.195806	0.40483	1.46453	0.0901773	0.263172	0.483903	3.31502	4.74432	0.00410856	5.11206e-05
rs10845868	12	14154639	6857	0.367726	5043	0.101849	-0.92209	1.48748	0.0910686	0.262604	0.508597	4.72231	4.74279	1.43736e-05	5.14772e-05
rs2640518	12	51561056	6856	0.125146	1716	-0.0519425	1.36495	2.3304	0.134252	0.382439	0.776415	4.52751	4.73244	3.53868e-05	5.39558e-05
rs2012697	1	72819612	6850	0.333504	4569	-0.176323	-0.581445	-1.45008	0.0946021	0.271997	0.507396	3.46199	4.72887	0.00249694	5.48347e-05
rs2339744	5	172450020	6822	0.250366	3416	0.0605656	0.449677	2.31166	0.104251	0.302595	0.555981	4.3344	4.72684	8.32635e-05	5.53418e-05
rs11169735	12	51566350	6857	0.124982	1714	-0.0528557	1.36135	2.33415	0.134318	0.382418	0.776426	4.52155	4.72349	3.63545e-05	5.61895e-05
rs7526836	1	62468855	6854	0.239057	3277	-0.313568	1.36767	0.533268	0.104076	0.312001	0.502291	4.44973	4.71674	5.01728e-05	5.79309e-05
rs34095989	12	57627717	6834	0.341528	4668	0.0732115	-1.23892	-0.864683	0.0942759	0.280495	0.532638	4.62356	4.71622	2.28024e-05	5.80694e-05
rs10960174	9	11753695	6706	0.318297	4269	-0.174507	1.09231	1.61734	0.0974499	0.287526	0.536564	4.71272	4.71561	1.50393e-05	5.82278e-05
rs11187808	10	95949432	6396	0.483583	6186	0.0090175	0.204599	-2.05095	0.0933442	0.265478	0.450402	4.68766	4.71387	1.69187e-05	5.86887e-05
rs7834336	8	133448569	6811	0.314711	4287	-0.0463192	1.25361	0.10288	0.095565	0.275	0.549399	4.55947	4.70389	3.06039e-05	6.1392e-05
rs2906855	12	68388126	6858	0.462963	6350	0.249342	-0.678236	1.34657	0.0896395	0.261968	0.483666	3.93037	4.69926	0.000442132	6.26858e-05
rs4758042	11	8129296	6814	0.363149	4949	-0.00121218	0.439126	2.20887	0.0927015	0.279713	0.509032	4.52948	4.69919	3.50722e-05	6.27068e-05
rs7190492	16	53828752	6803	0.33522	4561	-0.162892	-0.996007	0.134393	0.0953371	0.278623	0.504389	3.60881	4.69738	0.00148588	6.32193e-05
rs4741277	9	13055896	6854	0.497228	6816	-0.149704	-0.876059	-0.530776	0.0883093	0.261905	0.475473	3.46649	4.69594	0.00245829	6.36304e-05
rs17672692	6	7214499	6766	0.196054	2653	-0.279721	-0.509551	-1.42491	0.113878	0.325657	0.558981	2.90312	4.69582	0.0147863	6.36655e-05
rs6799277	3	109974076	6830	0.143192	1956	0.0748301	1.33847	1.50193	0.126105	0.367448	0.715932	4.09761	4.69417	0.000225953	6.41389e-05
rs11826453	11	6173346	6855	0.424654	5822	0.083982	0.357013	2.09624	0.0896788	0.262665	0.519865	4.1887	4.69214	0.000154919	6.47265e-05
rs241758	22	33345670	6845	0.284953	3901	0.0300355	0.989752	1.5093	0.0976548	0.295145	0.531997	4.26924	4.68853	0.000110201	6.57874e-05
rs12459743	19	46533914	6855	0.357768	4905	-0.211483	0.0110795	-1.76722	0.0923539	0.274137	0.500888	3.53792	4.68607	0.00191421	6.65163e-05
rs10805402	5	65132797	6858	0.386775	5305	-0.36556	0.41872	-0.777012	0.0918262	0.272122	0.472097	2.33252	4.68259	0.065853	6.75644e-05
rs10462421	5	84033417	6842	0.241815	3309	0.0214946	-0.246178	2.52009	0.104415	0.308166	0.560893	4.6249	4.68086	2.26612e-05	6.80914e-05
rs1931737	10	129281900	6789	0.366843	4981	0.143598	-1.09145	1.01798	0.0937192	0.270807	0.501394	4.63989	4.67694	2.11412e-05	6.92965e-05
rs11653011	17	53519844	6855	0.424581	5821	-0.205512	0.604339	-1.6141	0.0900491	0.258651	0.495081	4.14076	4.67635	0.000189151	6.9482e-05
rs390488	1	241068852	6856	0.330222	4528	-0.321793	1.03674	-0.472126	0.0948502	0.275587	0.500816	3.94696	4.67498	0.00041417	6.99089e-05
rs7333395	13	104956468	6851	0.208583	2858	-0.0620391	-0.420731	-2.66514	0.109337	0.325709	0.632898	4.34024	4.674	8.11789e-05	7.02166e-05
rs2373256	14	87134407	6817	0.48335	6590	-0.0528606	0.657337	1.91871	0.088464	0.25812	0.485365	4.57639	4.67013	2.83277e-05	7.14426e-05
rs9941349	16	53825488	6856	0.460254	6311	0.208364	0.743736	0.457412	0.0914809	0.257626	0.477652	2.98982	4.66999	0.0114528	7.14863e-05
rs35742417	6	7247344	6854	0.19164	2627	-0.220476	-0.748198	-1.37959	0.113848	0.326597	0.562855	3.24469	4.66566	0.00517461	7.28834e-05
rs10823071	10	53238950	6821	0.366735	5003	-0.171807	-0.914325	-0.041475	0.091927	0.270418	0.511692	3.38372	4.66484	0.00326407	7.31523e-05
rs734586	2	241734754	6850	0.456788	6258	-0.0131384	0.490293	1.93815	0.089827	0.262129	0.461838	4.49085	4.66278	4.17476e-05	7.38274e-05
rs8180732	7	15108838	6857	0.139492	1913	-0.184484	1.59	1.18392	0.126835	0.359113	0.695022	4.64968	4.66257	2.02013e-05	7.38967e-05
rs7754620	6	129574015	6856	0.164673	2258	-0.151874	1.21663	2.09725	0.118899	0.357992	0.623406	4.6358	4.65237	2.15461e-05	7.73389e-05
rs1483185	3	53199014	6857	0.144159	1977	0.319153	0.322581	1.73608	0.126705	0.364354	0.610154	2.92598	4.65187	0.0138332	7.75095e-05
rs3744374	17	34072555	6857	0.319673	4384	0.302789	-0.962018	-1.41259	0.0936745	0.279676	0.510925	4.28444	4.6509	0.000103263	7.78439e-05
rs4425849	9	11869293	6856	0.136814	1876	-0.264684	1.27965	2.70231	0.129521	0.382352	0.800382	4.61691	4.6491	2.35139e-05	7.84727e-05
rs7298378	12	71074384	6857	0.147659	2025	-0.287004	-0.172118	-2.10483	0.125059	0.368394	0.63783	3.30933	4.64619	0.00418678	7.94946e-05
rs1875620	9	91540059	6857	0.455155	6242	0.0683527	-1.16725	-0.349489	0.089472	0.257485	0.481755	4.55414	4.64566	3.1356e-05	7.96826e-05
rs16893687	5	60982841	6857	0.337903	4634	-0.124661	-0.12325	2.40366	0.0947678	0.287332	0.53156	4.57449	4.64256	2.85748e-05	8.07899e-05
rs2241403	5	53828095	6855	0.433917	5949	-0.117306	0.722179	-1.70927	0.0906986	0.263345	0.499009	4.53111	4.64127	3.48139e-05	8.12524e-05
rs2753088	6	145563233	6857	0.259443	3558	-0.398027	0.786055	-0.75693	0.102407	0.302695	0.550972	3.02055	4.64092	0.0104427	8.13791e-05
rs552581	1	114659327	6853	0.465052	6374	-0.183051	-0.402534	-1.46612	0.0890439	0.263598	0.486391	3.30043	4.63935	0.00431173	8.19489e-05
rs2631834	2	54943102	6852	0.329028	4509	0.0883794	0.711277	-1.61152	0.0949724	0.27115	0.472754	4.45187	4.63876	4.96959e-05	8.21642e-05
rs907588	8	23485112	6857	0.105075	1441	-0.167341	-0.98011	-2.45051	0.144734	0.440439	0.750882	3.84012	4.63835	0.000627818	8.23149e-05
rs1861868	16	53790402	6855	0.461853	6332	-0.0536597	1.14638	0.173227	0.0888222	0.253783	0.473479	4.51773	4.63468	3.69863e-05	8.36651e-05
rs2587767	15	100876014	6841	0.144935	1983	0.412809	-1.61698	-0.43098	0.124973	0.392605	0.600141	4.14039	4.63036	0.000189443	8.52844e-05
rs4075822	18	54811081	6700	0.291642	3908	-0.145122	0.959765	1.90331	0.098719	0.283505	0.568569	4.62198	4.62484	2.29688e-05	8.73948e-05
rs9878804	3	184853053	6827	0.441336	6026	0.0584661	-1.14079	0.275297	0.0908862	0.255162	0.49758	4.54999	4.62365	3.19538e-05	8.78553e-05
rs1264880	1	111944073	6857	0.393248	5393	0.158666	0.581934	-1.63617	0.0917632	0.265382	0.484576	4.15187	4.62264	0.000180642	8.82482e-05
rs7220012	17	14194963	6804	0.423207	5759	0.126272	0.558417	-1.79229	0.0897989	0.26245	0.495866	4.31717	4.62059	8.97061e-05	8.90513e-05
rs1469120	16	65353714	6792	0.368154	5001	-0.243943	1.16651	0.836402	0.0927396	0.274751	0.475747	4.49747	4.61979	4.05235e-05	8.93693e-05
rs9505150	6	7323740	6850	0.191241	2620	-0.129461	-0.969747	-1.41727	0.113637	0.333903	0.554916	3.74305	4.61884	0.000907134	8.97462e-05
rs17118	3	38404472	6509	0.36173	4709	0.0259009	-0.368606	2.31839	0.0957267	0.265198	0.541581	4.59255	4.61757	2.6305e-05	9.02503e-05
rs1075440	16	53790906	6854	0.361614	4957	0.0644953	-1.191	0.144385	0.0913827	0.264292	0.522256	4.53921	4.60769	3.3558e-05	9.42714e-05
rs7153264	14	22692095	6852	0.172869	2369	-0.183083	1.2906	-1.41337	0.117706	0.333264	0.655406	4.56213	4.60468	3.02343e-05	9.55317e-05
rs695029	11	126174164	6857	0.227213	3116	0.321405	0.662752	0.0654771	0.105291	0.307371	0.61628	2.15628	4.60037	0.0978051	9.73619e-05
rs6757230	2	207326256	6857	0.221234	3034	0.299616	0.229625	-2.02071	0.106711	0.318849	0.54945	3.80058	4.59868	0.000730197	9.80907e-05
rs11041791	11	8212242	6821	0.299296	4083	-0.0105738	0.363846	2.23113	0.0975018	0.285302	0.512419	4.46398	4.59618	4.70845e-05	9.91752e-05
rs990871	1	72823713	6858	0.333552	4575	-0.172074	-0.562338	-1.39818	0.0945087	0.271653	0.504475	3.35511	4.59524	0.00359435	9.95841e-05
Abbreviations: variant.id - rs number of tested SNP; chr - chromosome; pos - base pair position in the GRCh37 reference genome; n.obs - the number of samples with non-missing genotypes; freq - the estimated effect allele frequency (minor allele); MAC - the minor allele count; Est.G - the effect size estimate for the genotype term in the entire study group; Est.G:p42 - the effect size estimate for…
