# Supplementary material for: The Analysis of a Genome-Wide Association Study (GWAS) of Overweight and Obesity in Psoriasis
Source: Int J Mol Sci. 2022 Jul 2;23(13):7396. doi: 10.3390/ijms23137396 (PMC9266424; doi:10.3390/ijms23137396)
Supplement: Supplementary file 1 [file ijms-23-07396-s001.zip › Supplementary Table S2 Distribution of genotype frequencies of the detected 11 significant SNPs.xlsx]

## Sheet: Arkusz1
	Table S2. Distribution of genotype frequencies of the detected 11 significant SNPs.
	group	genotype	rs ID
			rs1558902	rs10968110	rs1556519	rs12972098	rs4551082	rs12676670	rs4609724	rs9320269	rs2338833	rs1321529	rs696574
	control	BB	3134	2183	1847	1613	4551	1602	1602	1595	1881	1599	4054
		BA	2324	2731	2934	2941	1204	2923	2923	2927	2862	2926	1669
		AA	386	978	1116	1335	59	1374	1375	1377	1156	1375	177
	type I	BB	445	312	282	237	692	261	261	258	279	261	625
		BA	396	446	452	460	187	444	444	447	458	443	264
		AA	73	149	179	214	11	213	213	213	181	214	25
	type II	BB	122	79	77	67	181	66	66	66	75	66	164
		BA	101	119	123	123	56	122	122	120	128	122	77
		AA	22	44	46	53	1	57	58	59	41	57	4
	Abbreviation: group - indicates the tested study groups; genotype - indicates the tested genotypes, A and B presents the tested minor and major allele, respectively; rs ID - indicates the tested SNP.
