# Supplementary material for: The Analysis of a Genome-Wide Association Study (GWAS) of Overweight and Obesity in Psoriasis
Source: Int J Mol Sci. 2022 Jul 2;23(13):7396. doi: 10.3390/ijms23137396 (PMC9266424; doi:10.3390/ijms23137396)
Supplement: Supplementary file 1 [file ijms-23-07396-s001.zip › Supplementary Table S3 The study group data analysis..xlsx]

## Sheet: Arkusz4
Table S3: The study group data analysis
	psoriasis group		control group
	male	female	male	female
	all n= 972		all n= 5878
sex	619	353	2877	3001
mean BMI [kg/m2]	28.1	27.4	26.2	24.9
SD BMI [kg/m2]	4.9	5.8	4.2	5,1
min-max BMI[kg/m2]	17.3-48.2	16.2-46.9	14.9-51.9	14.0-62.1
age [years]	45.5	49.0	43.0	43.8
SD age [years]	14.9	16.1	15.1	13.3
min-max age range	15.0-93.0	11.0-85.0	20.0-77.0	20.0-77.0
AOO mean [years]	27.5	27.6	-	-
AOO SD [years]	14.4	17.3	-	-
min-max AOO range [years]	0.0-77.0	0.0-81.0	-	-
type I psoriasis	498	269	-	-
type II psoriasis	121	84	-	-
PASI mean [points]	13.6	10.8	-	-
PASI SD [points]	9.7	8.5	-	-
min-max PASI range [points]	0.0-67.2	0.0-65.4	-	-
BSA mean [%]	24.7	19.1	-	-
BSA SD [%]	21.2	17.9	-	-
min-max BSA range [%]	0.0-97.0	0.0-90.0	-	-
DLQI mean [points]	11.9	12.3	-	-
DLQI SD [points]	7.4	7.6	-	-
min-max DLQI range [points]	0.0-30.0	0.0-30.0	-	-
PsA	147	83	-	-
Abbreviation: BMI - body mass index, SD - standard deviation; AOO - age of psorasis onset; PASI - psorasis area severity index; BSA - body surface area; DLQI - dermatology life quality index; PsA - psoriatic arithritis
